# Supplementary material for: Epidemiology and Clinical Features of Invasive Fungal Infection in a US Health Care Network
Source: PubMed Central journal article supplement — Open Forum Infect Dis. 2018 Jul 31;5(8):ofy187. doi: 10.1093/ofid/ofy187 (PMC6104777; doi:10.1093/ofid/ofy187), 2018-07-31
Supplement: ofy187_suppl_supplementary_material.pdf [file ofy187_suppl_supplementary_material.pdf]

Supplementary Figure 1. Cohort Discovery Flowchart

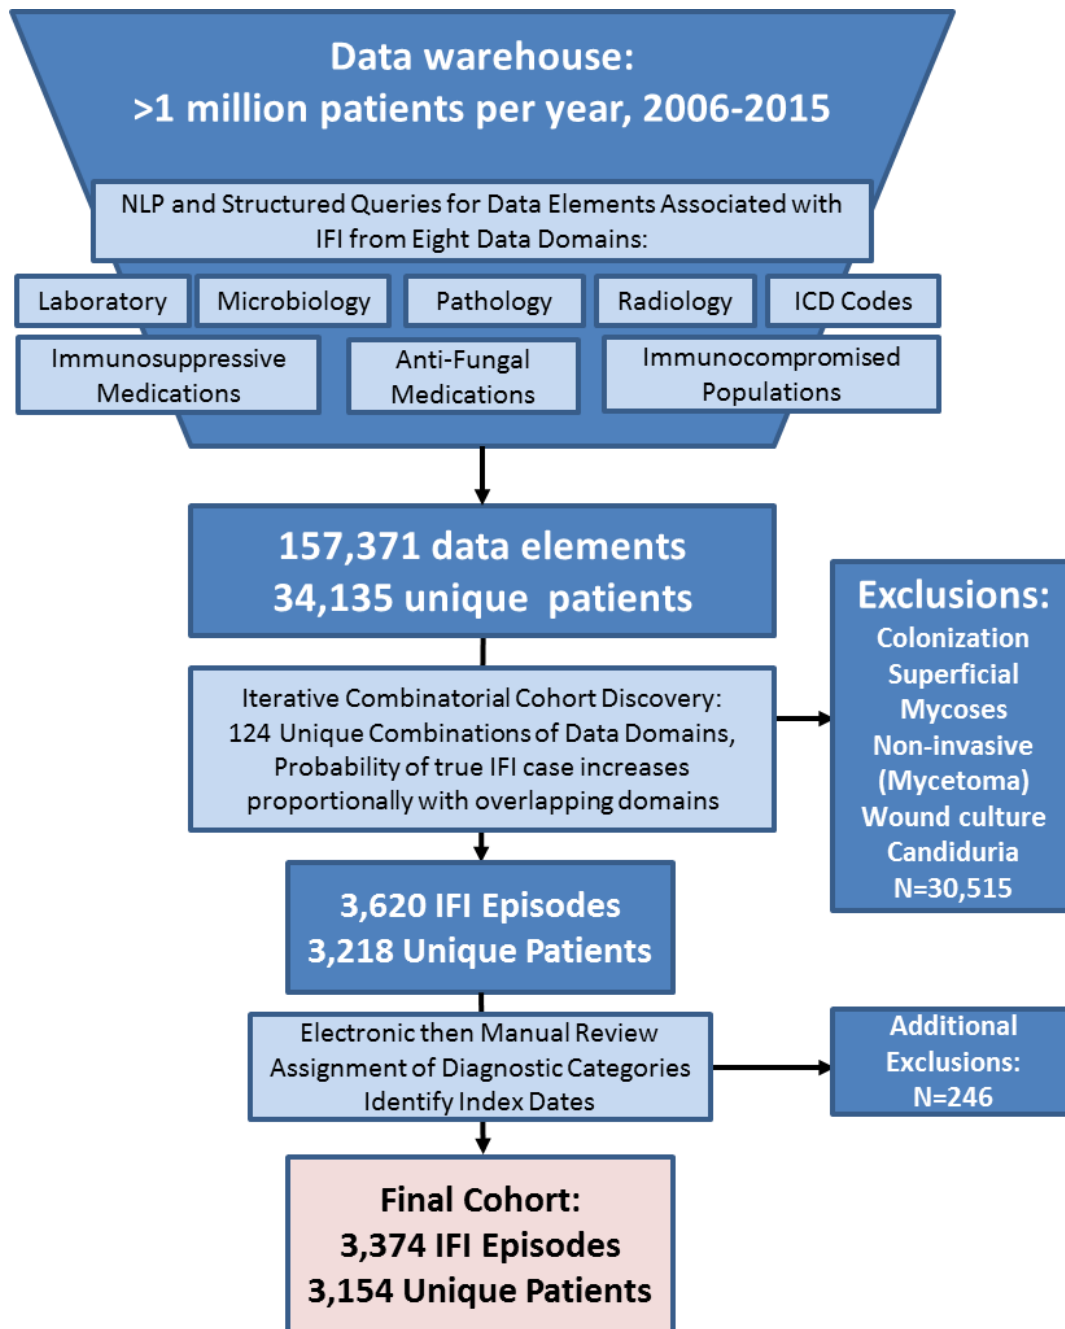

**Supplemental Figure 2. Distribution of IFI by fungal class**

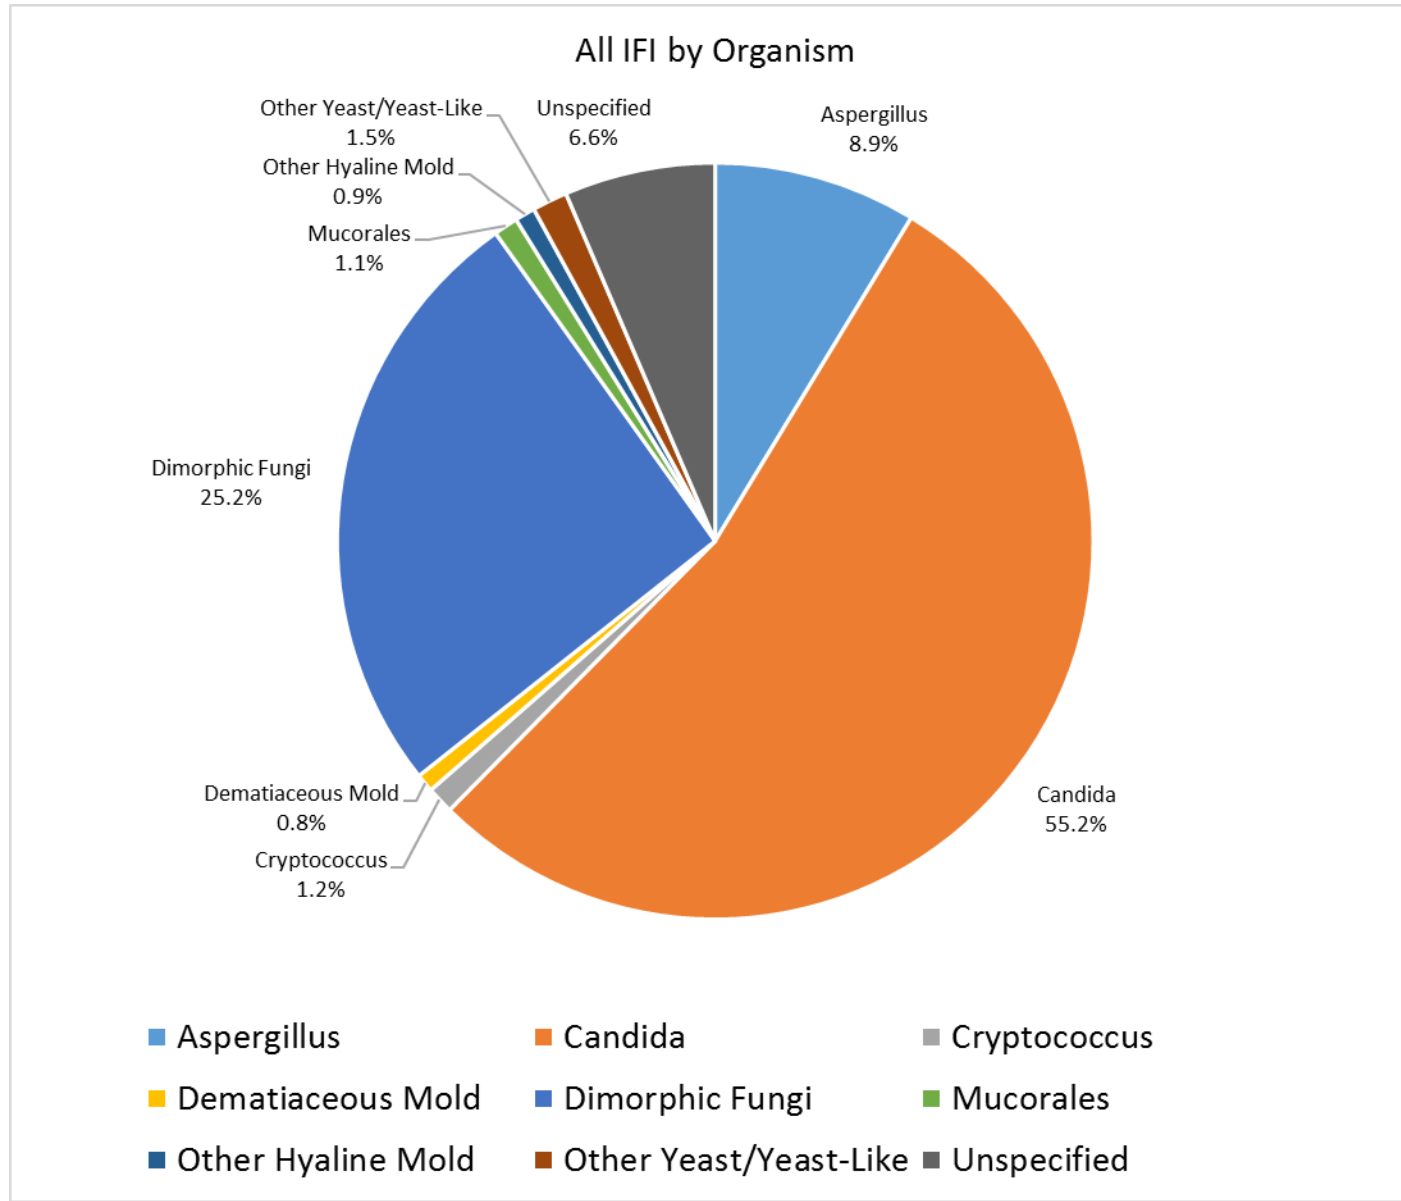

**Supplementary Table 1. Distribution of Species**

| <b>Category</b>               | <b>Species</b>              | <b>N=</b> | <b>%</b> | <b>Category</b>            | <b>Species</b>              | <b>N=</b> | <b>%</b> |
|-------------------------------|-----------------------------|-----------|----------|----------------------------|-----------------------------|-----------|----------|
| <b>Candida</b>                | Candida, not specified      | 151       | 8.1      | <b>Cryptococcus</b>        | Cryptococcus, not specified | 31        | 77.5     |
|                               | Candida albicans            | 1128      | 60.6     |                            | Cryptococcus albidus        | 1         | 2.5      |
|                               | Candida dubliniensis        | 12        | 0.6      |                            | Cryptococcus laurentii      | 4         | 10.0     |
|                               | Candida famata              | 2         | 0.1      |                            | Cryptococcus neoformans     | 23        | 57.5     |
|                               | Candida glabrata            | 454       | 24.4     | <b>Aspergillus</b>         | Aspergillus, not specified  | 290       | 96.3     |
|                               | Candida guilliermondii      | 19        | 1.0      |                            | Aspergillus flavus          | 7         | 2.3      |
|                               | Candida kefyr               | 6         | 0.3      |                            | Aspergillus fumigatus       | 40        | 13.3     |
|                               | Candida krusei              | 41        | 2.2      |                            | Aspergillus nidulans        | 3         | 1.0      |
|                               | Candida lipolytica          | 1         | 0.1      |                            | Aspergillus niger           | 1         | 0.3      |
|                               | Candida lusitaniae          | 54        | 2.9      | Aspergillus terreus        | 3                           | 1.0       |          |
|                               | Candida parapsilosis        | 121       | 6.5      | Aspergillus ustus          | 1                           | 0.3       |          |
|                               | Candida robusta             | 1         | 0.1      | <b>Dimorphic Fungi</b>     | Blastomyces, not specified  | 5         | 0.6      |
|                               | Candida tropicalis          | 47        | 2.5      |                            | Blastomyces dermatitidis    | 1         | 0.1      |
|                               | Torulopsis glabrata         | 1         | 0.1      |                            | Coccidioides, not specified | 778       | 91.6     |
| <b>Other Yeast/Yeast-Like</b> | Blastoschizomyces capitatus | 1         | 1.8      | Coccidioides immitis       | 78                          | 9.2       |          |
|                               | Cyberlindnera fabianii      | 1         | 1.8      | Histoplasma, not specified | 67                          | 7.9       |          |
|                               | Debaryomyces species        | 4         | 7.3      | Histoplasma capsulatum     | 7                           | 0.8       |          |
|                               | Geotrichum species          | 2         | 3.6      | Malassezia furfur          | 1                           | 0.1       |          |
|                               | Geotrichum capitatum        | 1         | 1.8      | Malassezia pachydermatis   | 1                           | 0.1       |          |
|                               | Pichia farinosa             | 1         | 1.8      | Sporothrix schenckii       | 1                           | 0.1       |          |
|                               | Rhodotorula species         | 10        | 18.2     | <b>Mucorales</b>           | Absidia species             | 1         | 2.8      |

|                          |                          |    |      |                           |                          |    |      |
|--------------------------|--------------------------|----|------|---------------------------|--------------------------|----|------|
|                          | Rhodotorula mucilaginosa | 5  | 9.1  |                           | Actinomucor species      | 1  | 2.8  |
|                          | Saccharomyces cerevisiae | 24 | 43.6 |                           | Mucor, not specified     | 24 | 66.7 |
|                          | Trichosporon species     | 4  | 7.3  |                           | Mucor circinelloides     | 1  | 2.8  |
|                          | Trichosporon asahii      | 1  | 1.8  |                           | Rhizopus species         | 16 | 44.4 |
|                          | Trichosporon beigelii    | 1  | 1.8  |                           |                          |    |      |
| <b>Dematiaceous Mold</b> | Alternaria species       | 6  | 25.0 | <b>Other Hyaline Mold</b> | Acremonium species       | 1  | 2.9  |
|                          | Bipolaris species        | 6  | 25.0 |                           | Fusarium species         | 17 | 48.6 |
|                          | Cladosporium species     | 8  | 33.3 |                           | Fusarium solani          | 1  | 2.9  |
|                          | Curvularia species       | 6  | 25.0 |                           | Paecilomyces species     | 3  | 8.6  |
|                          | Ochroconis humicola      | 1  | 4.2  |                           | Pseudallescheria boydii  | 4  | 11.4 |
|                          | Scopulariopsis species   | 1  | 4.2  |                           | Scedosporium apiospermum | 5  | 14.3 |
|                          | Ulocladium species       | 1  | 4.2  |                           | Sepedonium               | 1  | 2.9  |
|                          | Exophiala jeanselmei     | 1  | 4.2  |                           | Trichophyton rubrum      | 1  | 2.9  |
|                          |                          |    |      |                           | Trichoderma species      | 2  | 5.7  |

**Supplementary Figure 3. Proportion of Candida Cases, by Species**

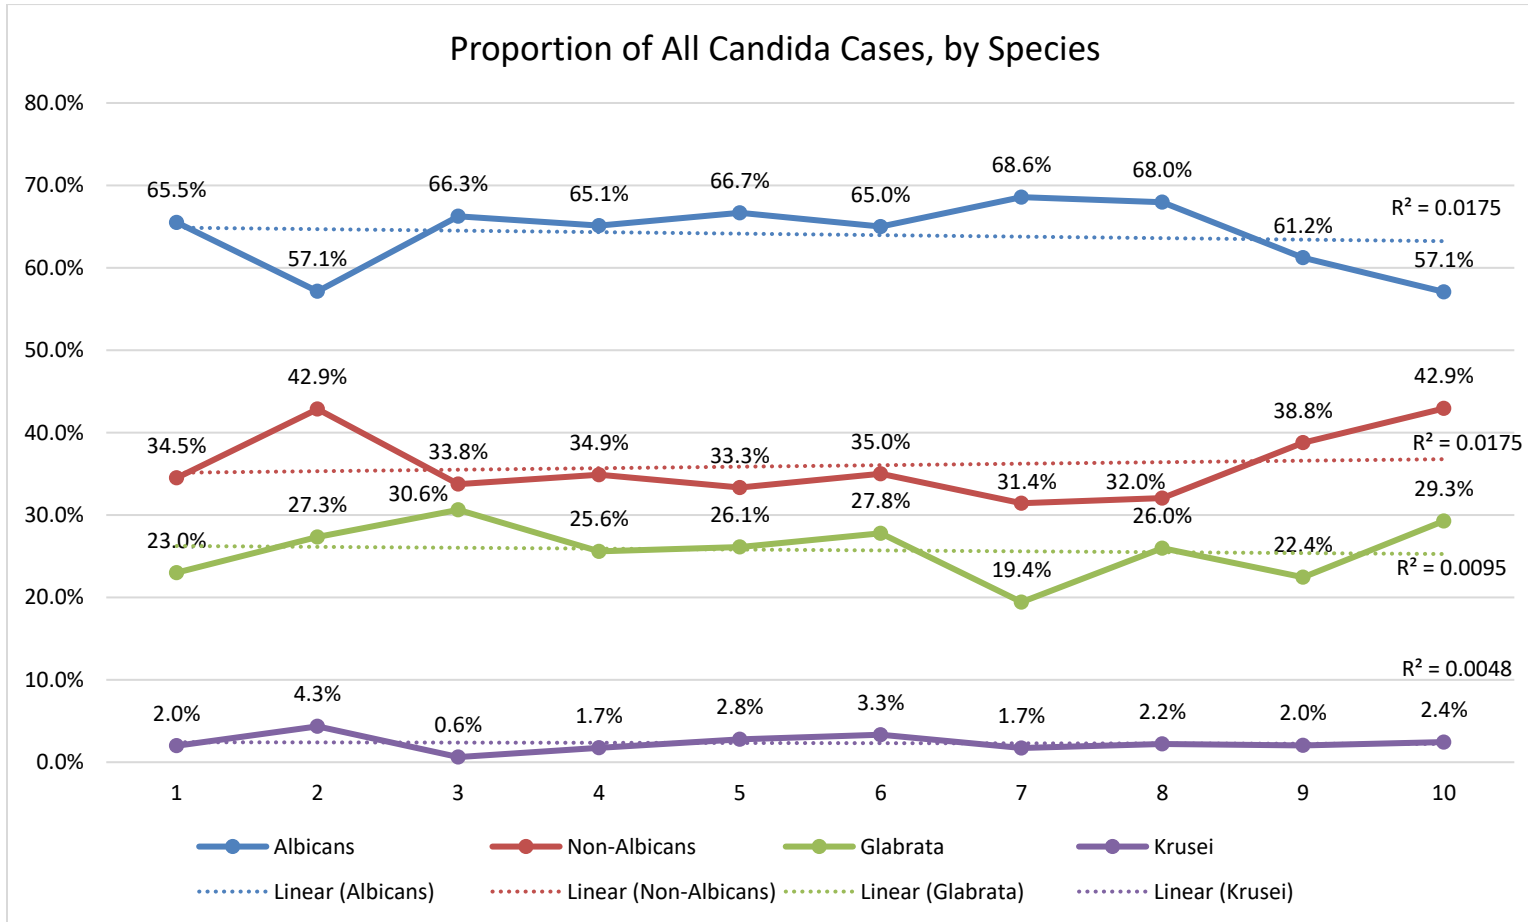

**Supplementary Table 2. Data Domain Combinations with Percent Confirmed IFI**

| <b>DOMAINS</b>                         | <b>Data Count (Cases)</b> | <b>True Positive IFI</b> | <b>Percent</b> |
|----------------------------------------|---------------------------|--------------------------|----------------|
| MEDS,PATH_ST,LAB                       | 1                         | 1                        | 100            |
| MICRO,ICD,LAB                          | 8                         | 8                        | 100            |
| MICRO,ICD,RAD                          | 1                         | 1                        | 100            |
| MICRO,RAD,LAB                          | 2                         | 2                        | 100            |
| RAD,PATH_ST,LAB                        | 1                         | 1                        | 100            |
| ICD,MEDS,PATH_ST,LAB                   | 9                         | 9                        | 100            |
| ICD,MEDS,RAD,LAB                       | 2                         | 2                        | 100            |
| ICD,MEDS,RAD,PATH_ST                   | 3                         | 3                        | 100            |
| ICD,RAD,PATH_ST,LAB                    | 4                         | 4                        | 100            |
| MICRO,ICD,PATH_ST,LAB                  | 3                         | 3                        | 100            |
| MICRO,ICD,RAD,LAB                      | 5                         | 5                        | 100            |
| MICRO,ICD,RAD,PATH_ST                  | 4                         | 4                        | 100            |
| MICRO,MEDS,PATH_ST,LAB                 | 2                         | 2                        | 100            |
| MICRO,MEDS,RAD,LAB                     | 1                         | 1                        | 100            |
| MICRO,MEDS,RAD,PATH_ST                 | 2                         | 2                        | 100            |
| RAD,PATH_ST,LAB,IMMSUPP                | 4                         | 4                        | 100            |
| ICD,MEDS,RAD,PATH_ST,LAB               | 4                         | 4                        | 100            |
| MICRO,ICD,MEDS,PATH_ST,LAB             | 10                        | 10                       | 100            |
| MICRO,ICD,PATH_ST,LAB,IMMSUPP          | 2                         | 2                        | 100            |
| MICRO,MEDS,PATH_ST,LAB,IMMSUPP         | 10                        | 10                       | 100            |
| MICRO,ICD,MEDS,RAD,PATH_ST,LAB         | 3                         | 3                        | 100            |
| MICRO,ICD,RAD,PATH_ST,LAB,IMMSUPP      | 3                         | 3                        | 100            |
| MICRO,MEDS,RAD,PATH_ST,LAB,IMMSUPP     | 3                         | 3                        | 100            |
| MICRO,ICD,MEDS,RAD,PATH_ST,LAB,IMMSUPP | 54                        | 53                       | 98.1           |
| ICD,RAD,LAB                            | 17                        | 16                       | 94.1           |
| ICD,PATH_ST,LAB                        | 14                        | 13                       | 92.9           |
| ICD,PATH_ST,LAB,IMMSUPP                | 20                        | 18                       | 90             |
| MICRO,ICD,MEDS,RAD,LAB                 | 10                        | 9                        | 90             |
| ICD,MEDS,RAD,PATH_ST,LAB,IMMSUPP       | 30                        | 27                       | 90             |
| MICRO,ICD,MEDS,PATH_ST,LAB,IMMSUPP     | 32                        | 28                       | 87.5           |

|                                    |     |     |      |
|------------------------------------|-----|-----|------|
| MICRO,ICD,MEDS,LAB                 | 13  | 11  | 84.6 |
| MICRO,ICD,RAD,PATH_ST,LAB          | 6   | 5   | 83.3 |
| MEDS,LAB,IMMSUPP                   | 154 | 127 | 82.5 |
| MICRO,ICD,MEDS,RAD,PATH_ST,IMMSUPP | 40  | 33  | 82.5 |
| ICD,MEDS,PATH_ST,LAB,IMMSUPP       | 11  | 9   | 81.8 |
| MEDS,RAD,PATH_ST,LAB,IMMSUPP       | 11  | 9   | 81.8 |
| MICRO,ICD,MEDS,PATH_ST             | 16  | 13  | 81.3 |
| MICRO,PATH_ST,LAB                  | 5   | 4   | 80   |
| MICRO,ICD,MEDS,RAD                 | 20  | 16  | 80   |
| MICRO,ICD,MEDS,RAD,PATH_ST         | 10  | 8   | 80   |
| MEDS,RAD,LAB,IMMSUPP               | 29  | 23  | 79.3 |
| MICRO,ICD,MEDS                     | 197 | 152 | 77.2 |
| ICD,LAB                            | 87  | 67  | 77   |
| MEDS,LAB                           | 21  | 16  | 76.2 |
| ICD,MEDS,RAD,LAB,IMMSUPP           | 33  | 25  | 75.8 |
| MICRO,ICD,MEDS,RAD,LAB,IMMSUPP     | 27  | 20  | 74.1 |
| ICD,RAD,LAB,IMMSUPP                | 19  | 14  | 73.7 |
| MICRO,MEDS,RAD,LAB,IMMSUPP         | 11  | 8   | 72.7 |
| MICRO,ICD,MEDS,LAB,IMMSUPP         | 58  | 42  | 72.4 |
| MEDS,PATH_ST,LAB,IMMSUPP           | 18  | 13  | 72.2 |
| MICRO,ICD,MEDS,RAD,IMMSUPP         | 54  | 39  | 72.2 |
| MICRO,MEDS,LAB                     | 7   | 5   | 71.4 |
| MICRO,MEDS,LAB,IMMSUPP             | 39  | 27  | 69.2 |
| ICD,LAB,IMMSUPP                    | 84  | 58  | 69   |
| MICRO,ICD,MEDS,IMMSUPP             | 351 | 241 | 68.7 |
| ICD,MEDS,RAD                       | 3   | 2   | 66.7 |
| MEDS,RAD,LAB                       | 3   | 2   | 66.7 |
| MICRO,RAD,LAB,IMMSUPP              | 3   | 2   | 66.7 |
| MICRO,ICD,RAD,LAB,IMMSUPP          | 6   | 4   | 66.7 |
| ICD,MEDS,LAB,IMMSUPP               | 41  | 26  | 63.4 |
| MICRO,ICD,MEDS,PATH_ST,IMMSUPP     | 57  | 35  | 61.4 |
| MICRO,ICD,LAB,IMMSUPP              | 5   | 3   | 60   |
| RAD,LAB,IMMSUPP                    | 35  | 20  | 57.1 |

|                                |     |     |      |
|--------------------------------|-----|-----|------|
| MICRO,LAB                      | 14  | 7   | 50   |
| ICD,MEDS,PATH_ST               | 10  | 5   | 50   |
| ICD,RAD,PATH_ST,LAB,IMMSUPP    | 4   | 2   | 50   |
| RAD,LAB                        | 28  | 13  | 46.4 |
| ICD,MEDS,PATH_ST,IMMSUPP       | 34  | 15  | 44.1 |
| ICD,MEDS,LAB                   | 14  | 6   | 42.9 |
| PATH_ST,LAB,IMMSUPP            | 49  | 21  | 42.9 |
| MICRO,MEDS                     | 627 | 266 | 42.4 |
| MICRO,MEDS,PATH_ST,IMMSUPP     | 110 | 46  | 41.8 |
| ICD,RAD                        | 17  | 7   | 41.2 |
| MICRO,MEDS,RAD                 | 5   | 2   | 40   |
| MICRO,MEDS,RAD,PATH_ST,IMMSUPP | 13  | 5   | 38.5 |
| MICRO,MEDS,IMMSUPP             | 882 | 338 | 38.3 |
| LAB,IMMSUPP                    | 526 | 201 | 38.2 |
| ICD,MEDS,RAD,IMMSUPP           | 21  | 8   | 38.1 |
| ICD,MEDS,RAD,PATH_ST,IMMSUPP   | 24  | 9   | 37.5 |
| MICRO,MEDS,PATH_ST             | 30  | 11  | 36.7 |
| ICD,PATH_ST,IMMSUPP            | 105 | 37  | 35.2 |
| MEDS,RAD,PATH_ST               | 6   | 2   | 33.3 |
| MICRO,ICD,RAD,PATH_ST,IMMSUPP  | 6   | 2   | 33.3 |
| MICRO,MEDS,RAD,IMMSUPP         | 47  | 15  | 31.9 |
| MICRO,ICD,PATH_ST,IMMSUPP      | 22  | 7   | 31.8 |
| ICD,RAD,PATH_ST,IMMSUPP        | 27  | 8   | 29.6 |
| LAB                            | 409 | 118 | 28.9 |
| ICD,PATH_ST                    | 95  | 25  | 26.3 |
| PATH_ST,LAB                    | 8   | 2   | 25   |
| MICRO,ICD,PATH_ST              | 20  | 5   | 25   |
| ICD,RAD,PATH_ST                | 9   | 2   | 22.2 |
| MICRO,LAB,IMMSUPP              | 18  | 4   | 22.2 |
| MICRO,PATH_ST,IMMSUPP          | 141 | 28  | 19.9 |
| RAD,PATH_ST                    | 41  | 8   | 19.5 |
| MICRO,ICD                      | 114 | 22  | 19.3 |
| MEDS,PATH_ST                   | 79  | 15  | 19   |



|                           |              |             |      |
|---------------------------|--------------|-------------|------|
| MICRO,PATH_ST             | 109          | 19          | 17.4 |
| MICRO,RAD,PATH_ST         | 7            | 1           | 14.3 |
| MICRO,ICD,IMMSUPP         | 131          | 18          | 13.7 |
| MICRO,RAD,IMMSUPP         | 62           | 7           | 11.3 |
| MICRO,IMMSUPP             | 2591         | 251         | 9.7  |
| MICRO,RAD                 | 33           | 3           | 9.1  |
| MICRO,ICD,RAD,IMMSUPP     | 12           | 1           | 8.3  |
| RAD,PATH_ST,IMMSUPP       | 81           | 6           | 7.4  |
| ICD,MEDS                  | 89           | 6           | 6.7  |
| MICRO                     | 3039         | 192         | 6.3  |
| MEDS,PATH_ST,IMMSUPP      | 275          | 16          | 5.8  |
| MEDS,RAD,PATH_ST,IMMSUPP  | 26           | 1           | 3.8  |
| ICD,MEDS,IMMSUPP          | 170          | 4           | 2.4  |
| PATH_ST,IMMSUPP           | 3354         | 21          | 0.6  |
| MEDS,RAD,IMMSUPP          | 191          | 1           | 0.5  |
| PATH_ST                   | 4744         | 12          | 0.3  |
| ICD                       | 1202         | 0           | 0    |
| IMMSUPP                   | 1144         | 0           | 0    |
| MEDS                      | 2995         | 1           | 0    |
| RAD                       | 1792         | 0           | 0    |
| ICD,IMMSUPP               | 843          | 0           | 0    |
| MEDS,IMMSUPP              | 4364         | 2           | 0    |
| MEDS,RAD                  | 26           | 0           | 0    |
| RAD,IMMSUPP               | 1516         | 0           | 0    |
| ICD,RAD,IMMSUPP           | 31           | 0           | 0    |
| MEDS,RAD,PATH_ST,LAB      | 1            | 0           | 0    |
| MICRO,PATH_ST,LAB,IMMSUPP | 1            | 0           | 0    |
| MICRO,RAD,PATH_ST,IMMSUPP | 13           | 0           | 0    |
| <b>Total Cases</b>        | <b>34135</b> | <b>3154</b> |      |
